# Supplementary material for: Real-World Outcomes of Immunotherapy in Second- or Later-Line Non-Small Cell Lung Cancer with Actionable Genetic Alterations
Source: MDPI journal article supplement (doi:10.3390/cancers15225450), 2023-11-16
Supplement: s1 [file s1]

## Supplementary contents

**Table S1.** Clinical Characteristics of Patients Receiving ICI Monotherapy as Second-Line or Later-Line Treatment

**Table S2.** Univariate analysis of the predictive factors of PFS in patients with AGA mutations

**Table S3.** Multivariate Analyses of the Predictive Factors of PFS in Patients With AGA Mutations (*EGFR*, *KRAS*, *HER2*, and *MET* subgroups)

**Table S4. PFS analysis of PD-L1 expression in patients with AGA mutations (*EGFR*, *KRAS*, *HER2*, and *MET* subgroups).**

**Figure S1.** Patient flow diagram

**Figure S2.** *KRAS* subtypes (A) Frequency rate of *KRAS* subtypes (B) mPFS per *KRAS* subtype.  
PFS, progression-free survival

**Table S1.** Clinical characteristics of patients receiving ICI monotherapy as second-line or later-line treatment.

| AGA type n (%)                    |                                      | AGA<br>n = 324           | Wild Type<br>n = 602     | <i>p</i>                |
|-----------------------------------|--------------------------------------|--------------------------|--------------------------|-------------------------|
| Demographic data                  |                                      |                          |                          |                         |
| Age                               | Median age<br>(95% range)<br>(years) | 63.1<br>(39.3-81.7)      | 66.9<br>(44.8-82.4)      |                         |
|                                   | <65                                  | 183 (56.5)               | 234 (38.9)               | <0.001                  |
|                                   | ≥65                                  | 141 (43.5)               | 368 (61.1)               |                         |
| Sex (n)                           | Male                                 | 172 (53.1)               | 527 (87.5)               | <0.001                  |
|                                   | Female                               | 152 (46.9)               | 75 (12.5)                |                         |
| Smoking                           | Never                                | 174 (53.7)               | 105 (17.4)               | <0.001                  |
|                                   | Ex or Current                        | 150 (46.3)               | 497 (82.6)               |                         |
| ECOG                              | 0-1                                  | 315 (97.2)               | 584 (97.0)               | 1.0                     |
|                                   | ≥2                                   | 9 (2.8)                  | 18 (3.0)                 |                         |
| Histology                         | Non-squamous                         | 290 (89.5)               | 313 (52.0)               | <0.001                  |
|                                   | Others                               | 34 (10.5)                | 288 (47.8)               |                         |
| <b><u>Line of<br/>Therapy</u></b> | <b><u>2nd line</u></b>               | <b><u>153 (47.2)</u></b> | <b><u>524 (87.0)</u></b> | <b><u>&lt;0.001</u></b> |
|                                   | <b><u>Later line</u></b>             | <b><u>171 (52.8)</u></b> | <b><u>78 (13.0)</u></b>  |                         |
| Concomitant disease & therapy     |                                      |                          |                          |                         |
| HTN                               | No                                   | 193 (59.6)               | 345 (57.3)               | 0.8                     |
|                                   | Yes                                  | 129 (39.8)               | 253 (42.0)               |                         |
|                                   | NI                                   | 2 (0.6)                  | 7 (1.2)                  |                         |
| DM                                | No                                   | 244 (75.3)               | 443 (73.6)               | 0.6                     |
|                                   | Yes                                  | 79 (24.4)                | 154 (25.6)               |                         |
|                                   | NI                                   | 1 (0.3)                  | 5 (0.8)                  |                         |
| RT                                | No                                   | 280 (86.4)               | 453 (75.2)               | <0.001                  |
|                                   | Yes                                  | 44 (13.6)                | 149 (24.8)               |                         |
| Steroid †                         | No                                   | 248 (76.5)               | 479 (79.6)               | 0.3                     |
|                                   | Yes                                  | 76 (23.5)                | 123 (20.4)               |                         |
| Antibiotics§                      | No                                   | 273 (84.3)               | 495 (82.2)               | 0.5                     |
|                                   | Yes                                  | 51 (15.7)                | 107 (17.8)               |                         |

Note: Values are shown as number (%) unless indicated otherwise.

\* including crt; † steroid use to treat irAE during ICI therapy; § antibiotic use during ICI therapy; ICI, immune checkpoint inhibitor; AGA, actionable genetic alteration; ECOG, Eastern Cooperative Oncology Group performance status; HTN, hypertension; DM, diabetes mellitus; RT, radiotherapy.

1 **Table S2.** Univariate analysis of the predictive factors of PFS in patients with AGA mutations.

| Biomarkers                                | AGA                 |        | EGFR                 |      | KRAS                |        | HER2                 |      | MET                 |      | ALK                  |      | BRAF                 |      | ROS1                |      | RET                 |      |
|-------------------------------------------|---------------------|--------|----------------------|------|---------------------|--------|----------------------|------|---------------------|------|----------------------|------|----------------------|------|---------------------|------|---------------------|------|
|                                           | HR<br>(95% CI)      | P      | HR<br>(95% CI)       | P    | HR<br>(95% CI)      | P      | HR<br>(95% CI)       | P    | HR<br>(95% CI)      | P    | HR<br>(95% CI)       | P    | HR<br>(95% CI)       | P    | HR<br>(95% CI)      | P    | HR<br>(95% CI)      | P    |
| Age<br>(≥65, vs <65 )                     | 0.76<br>(0.60-0.96) | 0.02   | 0.72<br>(0.50-1.01)  | 0.1  | 0.71<br>(0.43-1.20) | 0.21   | 0.90<br>(0.43-1.87)  | 0.78 | 0.65<br>(0.28-1.51) | 0.32 | 0.15<br>(0.02-1.22)  | 0.08 | 4.11<br>(.66-25.79)  | 0.13 | NC                  |      | 0.76<br>(0.14-4.20) | 0.75 |
| Gender<br>(Female, vs Male)               | 1.20<br>(0.95-1.51) | 0.13   | 0.94<br>(0.67-1.32)  | 0.7  | 1.40<br>(0.84-2.35) | 0.20   | 1.19<br>(0.55-2.59)  | 0.66 | 1.57<br>(0.64-3.88) | 0.98 | 0.73<br>(0.18-3.05)  | 0.67 | 1.26<br>(0.28-5.73)  | 0.76 | 1.25<br>(0.24-6.63) | 0.79 | NC                  |      |
| Smoking<br>(yes, vs no)                   | 0.84<br>(0.66-1.06) | 0.14   | 0.96<br>(0.68-1.36)  | 0.8  | 0.65<br>(0.39-1.09) | 0.10   | 1.07<br>(0.49-2.35)  | 0.86 | 0.84<br>(0.36-1.94) | 0.68 | 0.92<br>(0.25-3.48)  | 0.91 | 1.73<br>(0.38-7.79)  | 0.48 | 0.70<br>(0.08-6.02) | 0.75 | NC                  |      |
| ECOG<br>( ≥2, vs 0-1)                     | 1.58<br>(0.81-3.06) | 0.18   | 2.14<br>(0.53-8.70)  | 0.3  | 2.54<br>(1.00-6.44) | 0.05   | 1.48<br>(0.20-11.03) | 0.70 | 0.85<br>(0.11-6.34) | 0.87 | NC                   |      | NC                   |      | NC                  |      | NC                  |      |
| Histology<br>(non-squamous vs.<br>others) | 1.22<br>(0.83-1.79) | 0.32   | 2.05<br>(0.99-4.23)  | 0.05 | 0.85<br>(0.36-1.98) | 0.71   | 0.76<br>(0.32-1.81)  | 0.54 | 1.36<br>(0.46-4.03) | 0.58 | 1.85<br>(0.23-15.06) | 0.57 | 0.85<br>(0.36-1.98)  | 0.71 | NC                  |      | 0.75<br>(0.08-6.73) | 0.79 |
| HTN<br>(yes, vs no)                       | 1.00<br>(0.98-1.01) | 0.89   | 1.00<br>(0.98-1.02)  | 0.8  | 0.65<br>(0.38-1.11) | 0.11   | 1.46<br>(0.66-3.20)  | 0.35 | 1.00<br>(0.98-1.02) | 0.81 | 0.51<br>(0.11-2.46)  | 0.40 | 2.98<br>(0.54-16.39) | 0.21 | 0.90<br>(0.22-3.66) | 0.88 | 0.89<br>(0.18-4.47) | 0.89 |
| DM<br>(yes, vs no)                        | 1.00<br>(0.98-1.02) | 0.72   | 1.06<br>(0.71-1.59)  | 0.8  | 1.07<br>(0.58-2.00) | 0.83   | 1.76<br>(0.82-3.75)  | 0.15 | 1.00<br>(0.98-1.02) | 0.81 | 2.46<br>(0.55-11.02) | 0.24 | 1.57<br>(0.35-7.11)  | 0.56 | NC                  |      | NC                  |      |
| RT<br>(yes, vs no)                        | 1.38<br>(1.00-1.91) | 0.05   | 0.87<br>(0.53-1.44)  | 0.6  | 1.73<br>(0.82-3.66) | 0.15   | 1.45<br>(0.66-3.21)  | 0.35 | NC                  |      | 3.73<br>(0.66-20.89) | 0.14 | NC                   |      | 0.34<br>(0.04-2.87) | 0.32 | 1.34<br>(0.15-12.1) | 0.79 |
| Steroid †<br>(yes, vs no)                 | 0.62<br>(0.46-0.83) | 0.001  | 0.73<br>(0.49-1.09)  | 0.1  | 0.34<br>(0.17-0.69) | 0.003  | 0.38<br>(0.15-0.95)  | 0.04 | 0.31<br>(0.07-1.30) | 0.11 | 1.51<br>(0.40-5.65)  | 0.54 | NC                   |      | 1.17<br>(0.22-6.05) | 0.86 | 1.34<br>(0.15-12.1) | 0.79 |
| antibiotics§<br>(yes, vs no)              | 0.68<br>(0.49-0.94) | 0.02   | 0.68<br>(0.43-1.08)  | 0.1  | 0.51<br>(0.26-1.01) | 0.054  | 0.74<br>(0.18-3.17)  | 0.70 | 0.60<br>(0.14-2.57) | 0.49 | 1.39<br>(0.37-5.24)  | 0.63 | NC                   |      | NC                  |      | 1.34<br>(0.15-12.1) | 0.79 |
| PD-L1 cutoff 1%<br>(High, vs Low)         | 0.62<br>(0.48-0.80) | 0.0002 | NC                   | 0.2  | 0.38<br>(0.22-0.65) | <0.001 | 0.55<br>(0.25-1.24)  | 0.15 | 0.54<br>(0.22-1.34) | 0.19 | 3.22<br>(0.39-26.33) | 0.28 | 0.24<br>(0.04-1.53)  | 0.13 | 1.44<br>(0.28-7.32) | 0.66 | NC                  |      |
| TMB cutoff 10<br>(High, vs Low)           | 0.91<br>(0.54-1.52) | 0.71   | 0.73<br>(0.28-1.90)  | 0.5  | 0.52<br>(0.17-1.59) | 0.25   | 0.45<br>(0.14-1.44)  | 0.18 | NC                  |      | NC                   |      | NC                   |      | NC                  |      | NC                  |      |
| TP53<br>(mutation, vs wild type)          | 0.95<br>(0.69-1.29) | 0.72   | 0.66<br>(0.33-1.31)  | 0.2  | 0.75<br>(0.44-1.25) | 0.27   | 0.67<br>(0.30-1.49)  | 0.33 | 2.50<br>(0.68-9.12) | 0.17 | NC                   |      | 1.87<br>(0.31-11.34) | 0.49 | NC                  |      | 0.69<br>(0.11-4.17) | 0.68 |
| STK11<br>(mutation, vs wild type)         | 1.66<br>(1.00-2.45) | 0.05   | 1.54<br>(0.37-6.43)  | 0.6  | 3.00<br>(1.53-5.90) | 0.001  | NC                   |      | 1.29<br>(0.17-9.98) | 0.81 | NC                   |      | 1.78<br>(0.18-17.23) | 0.62 | NC                  |      | NC                  |      |
| KEAP1<br>(mutation, vs wild type)         | 1.40<br>(0.76-2.58) | 0.28   | 5.47<br>(0.71-42.00) | 0.1  | 1.85<br>(0.79-4.33) | 0.15   | 0.66<br>(0.19-2.21)  | 0.50 | 5.15<br>(0.62-2.88) | 0.13 | NC                   |      | NC                   |      | NC                  |      | NC                  |      |

2 † steroid use to treat irAE during ICI therapy; § antibiotic use during ICI therapy; NC, not calculable; PFS, progression-free survival; HR, hazard ratio; CI, confidence interval; ECOG, Eastern Cooperative  
3 Oncology Group performance status; HTN, hypertension; DM, diabetes mellitus; RT, Radio therapy; TMB, tumor mutational burden.

4

**Table S3.** Multivariate analyses of the predictive factors of PFS in patients with AGA mutations (*EGFR*, *KRAS*, *HER2*, and *MET* subgroups).

| Biomarkers                               | AGA                 |        | KRAS                 |      | EGFR                |      | HER2                |      | MET                  |      |
|------------------------------------------|---------------------|--------|----------------------|------|---------------------|------|---------------------|------|----------------------|------|
|                                          | HR<br>(95%CI)       | P      | HR<br>(95%CI)        | P    | HR<br>(95%CI)       | P    | HR<br>(95%CI)       | P    | HR<br>(95%CI)        | P    |
| Smoking<br>(yes vs no)                   | 1.23<br>(0.71-2.14) | 0.46   | 0.83<br>(0.27-2.57)  | 0.74 | NC                  | NC   | 0.79<br>(0.16-4.0)  | 0.78 | 0.84<br>(0.19-3.75)  | 0.82 |
| Steroid <sup>†</sup><br>(yes vs no)      | 0.46<br>(0.23-0.92) | 0.03   | 0.59<br>(0.14-2.47)  | 0.47 | 2.82<br>(0.68-11.8) | 0.16 | 0.46<br>(0.07-3.0)  | 0.42 | 0.20<br>(0.02-1.81)  | 0.15 |
| Antibiotics <sup>\$</sup><br>(yes vs no) | 0.77<br>(0.37-1.59) | 0.5    | 0.47<br>(0.13-1.72)  | 0.26 | 0.41<br>(0.12-1.5)  | 0.18 | NC                  | NC   | 2.91<br>(0.18-46.36) | 0.45 |
| PD-L1 cutoff 1%<br>(High vs Low)         | 0.41<br>(0.25-0.68) | <0.001 | 0.21<br>(0.07-0.64)  | 0.01 | NC                  | NC   | 0.30<br>(0.04-2.2)  | 0.23 | 0.17<br>(0.03-0.89)  | 0.04 |
| TMB cutoff 10<br>(High vs Low)           | 1.19<br>(0.67-2.10) | 0.55   | 0.75<br>(0.14-3.40)  | 0.74 | 1.00<br>(0.37-2.7)  | 0.99 | 0.55<br>(0.09-3.2)  | 0.51 | NC                   | NC   |
| TP53<br>(mutation vs WT)                 | 1.00<br>(0.61-1.63) | 0.99   | 1.24<br>(0.41-3.75)  | 0.70 | NC                  | NC   | 0.41<br>(0.07-2.4)  | 0.33 | 9.78<br>(1.22-78.11) | 0.03 |
| STK11<br>(mutation vs WT)                | 2.25<br>(0.87-5.83) | 0.10   | 4.53<br>(1.05-19.47) | 0.04 | NC                  | NC   | NC                  | NC   | NC                   | NC   |
| KEAP1<br>(mutation vs WT)                | 1.48<br>(0.63-3.45) | 0.37   | 2.13<br>(0.49-9.27)  | 0.32 | NC                  | NC   | 1.32<br>(0.08-22.8) | 0.85 | NC                   | NC   |

5

Note: Values are shown as number (%) unless indicated otherwise.

6

<sup>†</sup> steroid use to treat irAE during ICI therapy; <sup>\$</sup> antibiotic use during ICI therapy; PFS, progression-free survival; AGA, actionable

7

genetic alteration; HR, hazard ratio; CI, confidence interval; TMB, tumor mutational burden. NC, not calculable;

8 **Table S4. PFS analysis of PD-L1 expression in patients with AGA mutations (*EGFR*, *KRAS*, *HER2*, and *MET* subgroups).**

| Survival Analysis |         | AGA<br>n=324 |                   |        | KRAS<br>n=72 |                   |        | EGFR<br>n=149 |                   |     | HER2<br>n=34 |                   |     | MET<br>n=32 |                   |     |
|-------------------|---------|--------------|-------------------|--------|--------------|-------------------|--------|---------------|-------------------|-----|--------------|-------------------|-----|-------------|-------------------|-----|
|                   |         | PFS          |                   |        | PFS          |                   |        | PFS           |                   |     | PFS          |                   |     | PFS         |                   |     |
|                   |         | n (%)        | median<br>(95%CI) | p      | n (%)        | median<br>(95%CI) | p      | n (%)         | median<br>(95%CI) | p   | n (%)        | median<br>(95%CI) | p   | n (%)       | median<br>(95%CI) | p   |
| Clinical factor   |         | 324          |                   |        | 72           |                   |        | 149           |                   |     | 34           |                   |     | 32          |                   |     |
| PD-L1 expression  |         | T            |                   |        | 72           |                   |        | 145           |                   |     | 33           |                   |     | 31          |                   |     |
| cutoff 1%         | H (≥1%) | 205 (64.7)   | 2.0 (2.0-3.0)     | <0.001 | 46 (63.9)    | 4.0 (2.1-6.1)     | <0.001 | 93 (64.1)     | 2.0 (2.0-2.0)     | 0.2 | 14 (42.4)    | 2.0 (2.0-NR)      | 0.1 | 23 (74.2)   | 5.1 (2.0-NR)      | 0.2 |
|                   | L (<1%) | 112 (35.3)   | 2.0 (2.0-2.0)     |        | 26 (36.1)    | 2.0 (1.0-3.0)     |        | 52 (35.9)     | 2.0 (2.0-2.0)     |     | 19 (57.6)    | 2.0 (1.0-3.0)     |     | 8 (25.8)    | 2.5 (1.0-NR)      |     |

Note: Values are shown as number (%) unless indicated otherwise.

PFS, progression free survival; AGA, actionable genetic alteration; CI, confidence interval. H, High; L, Low NR, not reached.

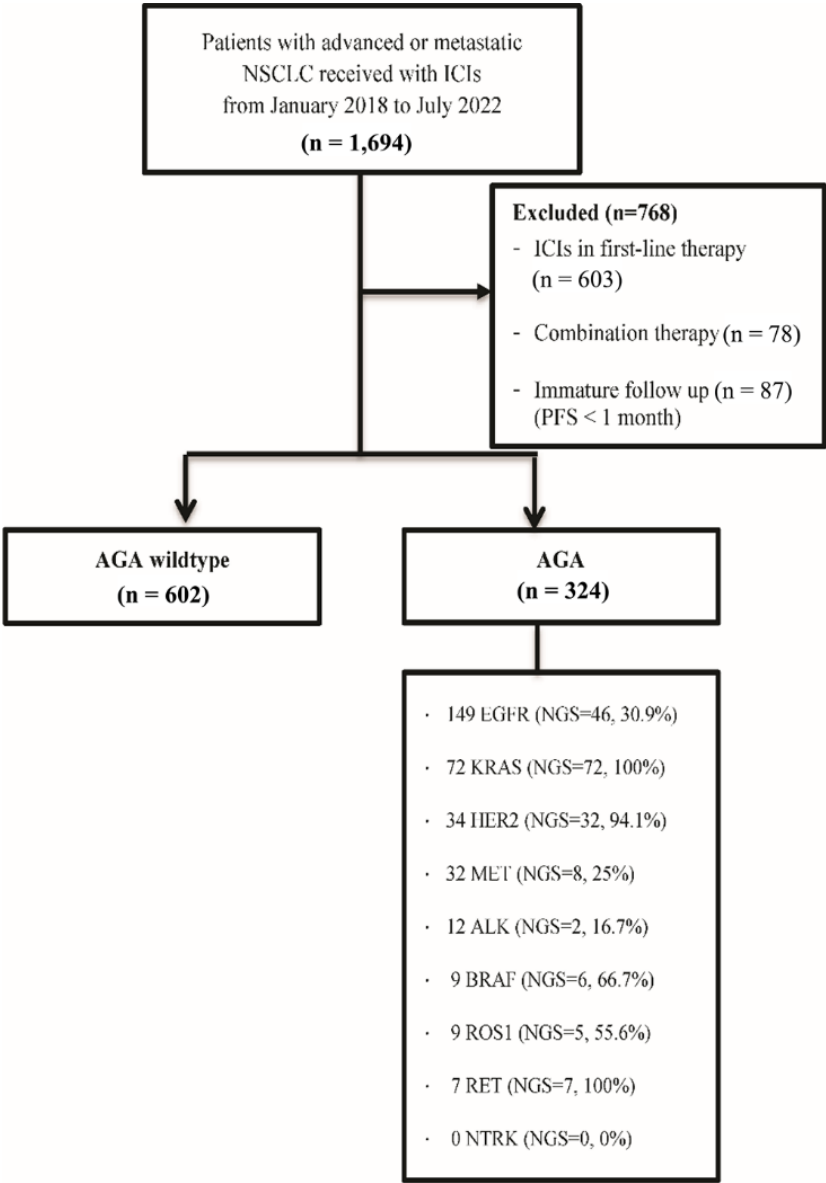

13 **Figure S1.** Patient flow diagram

(A)Frequency rate of KRAS subtypes

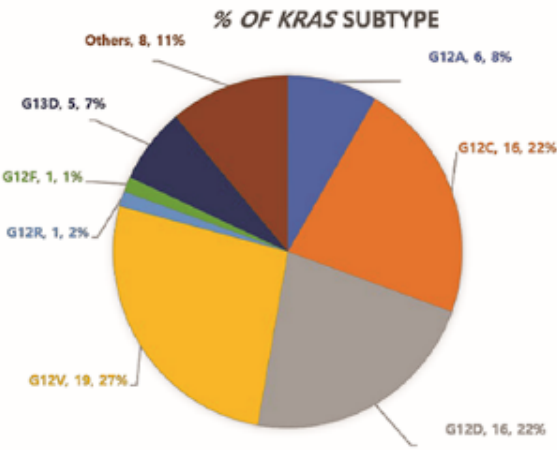

(B) mPFS per KRAS subtype

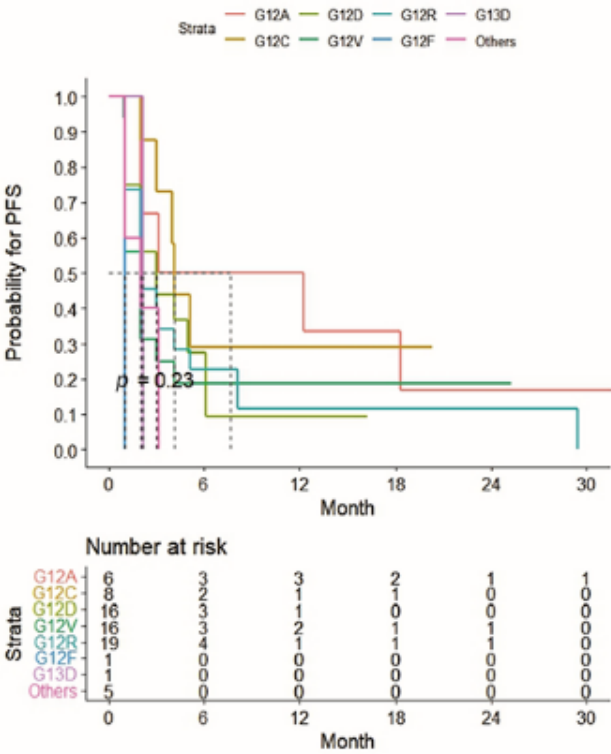

14

15 **Figure S2.** KRAS subtypes (A) Frequency rate of KRAS subtypes (B) mPFS per KRAS subtype.

16 PFS, progression-free survival
